# Supplementary material for: RIN4 Functions with Plasma Membrane H+-ATPases to Regulate Stomatal Apertures during Pathogen Attack
Source: PLoS Biol. 2009 Jun 30;7(6):e1000139. doi: 10.1371/journal.pbio.1000139 (PMC2694982; doi:10.1371/journal.pbio.1000139)
Supplement: Table S1 — LC–MS/MS data for all biological replicates. This is a summary of all the raw data from three positive and three negative replicates. Protein identification required a minimum of two peptides. These data were exported using Scaffold Viewer. Percentage indicates protein ID probability and the number of unique peptides identified per protein are in parentheses. (0.08 MB XLS) [file pbio.1000139.s006.xls]

## Sheet: Scaffold Table Export
	Protein Name	Accession Number	Molecular Weight	rps2 RPS2:HA (1)	rps2 RPS2:HA (2)	rps2 RPS2:HA (3)	rps2/rin4 (1)	rps2/rin4 (2)	rps2/rin4 (3)
1	RPM1-interacting protein 4 (RIN4)	IPI00517440	23 kDa	100% (7)	100% (9)	100% (8)
2	Disease resistance protein RPS2	IPI00547830	105 kDa		100% (3)	100% (2)
3	ATPase 1, plasma membrane-type (AHA1/AHA2)	IPI00526113	104 kDa	100% (13)	100% (8)	100% (4)
4	Early-responsive to dehydration stress protein (ERD4)	IPI00526219	82 kDa	100% (5)	100% (4)	99% (2)
5	Remorin	IPI00539947	23 kDa	99% (2)	100% (3)	99% (2)
6	Meprin and TRAF homology domain-containing protein	IPI00528031	43 kDa	100% (2)	100% (6)	100% (12)
7	Jacalin lectin family protein	IPI00543838	32 kDa	99% (2)	99% (2)	100% (2)
8	Jacalin lectin family protein	IPI00531879	74 kDa	100% (2)	100% (6)	100% (6)
9	Meprin and TRAF homology domain-containing protein	IPI00531061	45 kDa	100% (3)	100% (4)	100% (8)		100% (3)
10	F15I1.9 protein	IPI00523988	48 kDa	100% (9)	100% (9)	100% (11)		100% (3)
11	Clathrin heavy chain	IPI00527690	193 kDa	100% (6)	100% (2)	100% (5)		100% (4)
12	Isoform 1 of DEAD-box ATP-dependent RNA helicase 3	IPI00656967	81 kDa	100% (24)	100% (2)	100% (11)			100% (14)
13	DNA-binding family protein	IPI00539947	23 kDa		100% (3)	99% (2)
14	ATP synthase delta chain	IPI00528276	26 kDa		100% (3)	99% (2)
15	Chlorophyll a-b binding protein CP29.1	IPI00542715	31 kDa		100% (3)	99% (2)
16	Chlorophyll A-B binding protein, chloroplast (LHCB6)	IPI00524194	28 kDa		100% (2)	100% (3)
17	Photosystem I reaction center subunit III family protein	IPI00535877	24 kDa	100% (3)		100% (3)			100% (5)
18	Patellin-1	IPI00539425	64 kDa		100% (3)	100% (5)			100% (2)
19	Rieske (2Fe-2S) domain-containing protein	IPI00537413	32 kDa		100% (2)	100% (3)			100% (2)
20	S-adenosylmethionine synthetase	IPI00536966	43 kDa		100% (3)	100% (2)			100% (3)
21	Chloroplast inner envelope membrane protein	IPI00538321	38 kDa	100% (3)		99% (2)		100% (2)
22	Vacuolar ATP synthase subunit E	IPI00541951	26 kDa		100% (2)	99% (2)		100% (2)
23	RuBisCO large subunit-binding protein subunit alpha	IPI00525237	62 kDa		100% (3)	100% (4)		100% (5)	99% (2)
24	Hypothetical chloroplast inner envelope translocon	IPI00540685	112 kDa		100% (4)				100% (2)
25	DNA polymerase delta catalytic subunit	IPI00521258	122 kDa			100% (2)			100% (4)
26	Myrosinase-binding protein-like At1g52040	IPI00538129	50 kDa			100% (7)
27	Heat shock protein 81-2	IPI00537112 (+1)	80 kDa			100% (2)
28	Cell division protein ftsH homolog 2, chloroplast precursor	IPI00517420	75 kDa			100% (4)
29	Elongation factor Tu family protein	IPI00533633	86 kDa			100% (2)
30	Glutamine-tRNA ligase	IPI00540200	91 kDa	100% (17)			100% (4)
31	Expressed protein	IPI00543277	47 kDa			99% (2)			100% (4)
32	Isoform 2 of Cytochrome b6-f complex iron-sulfur subunit	IPI00530995 (+1)	23 kDa			99% (2)			100% (2)
33	Expressed protein	IPI00548101	43 kDa			100% (3)			100% (2)
34	DNA polymerase delta small subunit	IPI00531429 (+1)	51 kDa			99% (2)			100% (2)
35	DEAD-box ATP-dependent RNA helicase 11	IPI00521485	66 kDa	100% (5)					100% (4)
36	Fructose-bisphosphate aldolase	IPI00517861	39 kDa			100% (6)			100% (4)
37	Glutamate:glyoxylate aminotransferase 1 (GGT1)	IPI00524653 (+1)	53 kDa		100% (3)				100% (2)
38	Photosystem I reaction center subunit II-1, chloroplast precursor	IPI00523129 (+1)	23 kDa		100% (3)			100% (2)	100% (2)
39	Glycine hydroxymethyltransferase	IPI00532971	52 kDa		100% (3)	100% (2)		100% (2)	100% (2)
40	Probable peroxisomal	IPI00518426	40 kDa		100% (3)	99% (2)		100% (2)	100% (2)
41	Squalene synthetase	IPI00526988	47 kDa			99% (2)		100% (2)	100% (4)
42	Elongation factor Tu family protein	IPI00521033	110 kDa			99% (2)		100% (2)	100% (2)
43	Glucose-6-phosphate 1-dehydrogenase 1, chloroplast precursor	IPI00537871	65 kDa		100% (2)			100% (2)
44	Dihydrolipoamide dehydrogenase 2, plastidic	IPI00532975	60 kDa		100% (2)			100% (2)
45	ATP-dependent Clp protease proteolytic subunit	IPI00525806	33 kDa					100% (2)	100% (2)
46	Acyl-CoA dehydrogenase-related	IPI00529405	92 kDa					100% (2)	100% (3)
47	Meprin and TRAF homology domain-containing protein	IPI00539026	43 kDa			99% (2)		100% (2)
48	Endoplasmin homolog precursor	IPI00524027 (+1)	94 kDa			100% (4)		100% (2)
49	Serine hydroxymethyltransferase, mitochondrial precursor	IPI00525727	57 kDa		100% (2)			100% (2)	100% (3)
50	Chlorophyll a-b binding protein 4, chloroplast precursor	IPI00523187	28 kDa	99% (2)	100% (4)			100% (3)	100% (2)
51	Probable elongation factor 1-gamma 2	IPI00543798	46 kDa		100% (3)	99% (2)		100% (3)	100% (3)
52	Glycosyl hydrolase family 1 protein	IPI00522086 (+1)	51 kDa					100% (3)	100% (3)
53	Adenosylhomocysteinase 1	IPI00527713	53 kDa		100% (3)			100% (4)
54	Argininosuccinate synthase, chloroplast precursor	IPI00527702	54 kDa		100% (2)			100% (4)
55	Subtilase family protein	IPI00530746	82 kDa			100% (3)		100% (4)	100% (5)
56	Fructose-bisphosphate aldolase	IPI00541448	43 kDa		100% (3)	100% (3)		100% (4)	100% (2)
57	URF 4-related	IPI00537124	28 kDa		100% (2)	100% (4)		100% (5)	100% (7)
58	Expressed protein	IPI00522444	26 kDa		100% (2)	100% (2)		100% (5)	100% (6)
59	Dynamin-related protein 1C	IPI00524881	69 kDa			99% (2)		100% (5)	100% (7)
60	Actin-2	IPI00540686	42 kDa	100% (7)				100% (5)
61	Transketolase-like protein	IPI00537782	81 kDa		100% (7)	100% (8)		100% (7)	100% (4)
62	Lipoxygenase, chloroplast precursor	IPI00548522	102 kDa		100% (8)	100% (7)		100% (7)	100% (6)
63	Isoform 3 of Carbonic anhydrase, chloroplast precursor	IPI00518464 (+2)	30 kDa		100% (10)	100% (3)		100% (7)	100% (2)
64	Similar to C2 domain-containing protein	IPI00516837	68 kDa		100% (5)	100% (3)		100% (10)
65	Expressed protein	IPI00529331	150 kDa		100% (6)	100% (7)		100% (17)	100% (7)
66	Chloroplast 30S ribosomal protein S18	IPI00526224	12 kDa						100% (2)
67	Tubulin beta-4 chain	IPI00542050	50 kDa						100% (2)
68	50S ribosomal protein L1, chloroplast precursor	IPI00522851	38 kDa			100% (2)			100% (3)
69	3-oxoacyl-[acyl-carrier-protein] synthase I, chloroplast precursor	IPI00541557 (+1)	50 kDa		100% (3)	100% (2)
70	Expressed protein	IPI00607500 (+1)	38 kDa						100% (3)
71	Glyceraldehyde 3-phosphate dehydrogenase	IPI00544582	43 kDa	99% (2)	100% (2)			100% (2)	100% (2)
72	Chlorophyll A-B binding protein	IPI00535929 (+2)	29 kDa		100% (2)			100% (2)	100% (2)
73	Serine--glyoxylate aminotransferase	IPI00540396	44 kDa			100% (2)		100% (2)
74	Glutathione S-transferase	IPI00538125	24 kDa		100% (2)	100% (4)		100% (2)	100% (4)
75	Xyloglucan endotransglucosylase/hydrolase protein 4 precursor	IPI00528839	34 kDa	100% (4)		100% (5)		100% (5)	100% (4)
76	Glycosyl hydrolase family 1 protein	IPI00525561	63 kDa		100% (9)	100% (7)		100% (5)	100% (16)
77	Ribose-phosphate pyrophosphokinase 3	IPI00536204	45 kDa	100% (5)		100% (10)		100% (6)	100% (12)
78	Probable pyridoxin biosynthesis PDX1-like protein 1	IPI00534999	33 kDa					100% (8)	100% (3)
79	Aquaporin PIP1.3	IPI00533886	31 kDa		100% (2)				100% (2)
80	Catalase-2	IPI00520641	57 kDa		100% (3)	100% (4)		100% (5)	100% (5)
81	Myrosinase-binding protein-like At3g16470	IPI00538456	48 kDa	100% (11)	100% (18)	100% (19)		100% (12)	100% (5)
82	Tubulin alpha-3/alpha-5 chain	IPI00529143	50 kDa	100% (2)		100% (3)	86% (2)
83	Actin-7	IPI00524611	42 kDa		100% (2)	99% (2)	86% (2)	100% (2)
84	DEAD-box ATP-dependent RNA helicase 12	IPI00548726	57 kDa			99% (2)	100% (2)
85	Pentatricopeptide (PPR) repeat-containing protein	IPI00520465	83 kDa	100% (2)			100% (2)
86	Geranylgeranyl reductase	IPI00517438	52 kDa	99% (2)		99% (2)	100% (2)		100% (3)
87	ATP synthase alpha chain	IPI00520130	86 kDa	100% (3)		100% (5)	100% (2)		100% (2)
88	Vacuolar ATP synthase subunit B	IPI00523081 (+1)	54 kDa			100% (2)	100% (2)	100% (2)
89	2-oxoacid dehydrogenase family protein	IPI00531713	50 kDa		100% (2)		100% (2)	100% (2)
90	Similar to DREPP plasma membrane polypeptide-related	IPI00656875 (+1)	25 kDa				100% (2)	100% (6)	100% (2)
91	Transcription initiation factor IIE (TFIIE) alpha subunit	IPI00545732 (+1)	54 kDa	100% (5)			100% (2)
92	Microtubule-associated protein TORTIFOLIA1	IPI00530987	94 kDa			99% (2)	100% (2)		100% (2)
93	Probable peroxisomal	IPI00528534 (+1)	40 kDa		100% (7)		100% (2)	100% (5)	100% (6)
94	Annexin 4 (ANN4)	IPI00524217	36 kDa				100% (3)		100% (2)
95	Ribulose bisphosphate carboxylase small chain 1A	IPI00539020	20 kDa	100% (3)	100% (2)		100% (3)		100% (3)
96	40S ribosomal protein S2	IPI00528173	31 kDa	99% (2)			100% (3)
97	TATA box-binding protein-interacting protein-related	IPI00528249	50 kDa	100% (2)			100% (4)
98	Alpha	IPI00532980	106 kDa	100% (9)			100% (4)
99	Eukaryotic initiation factor 4A-1	IPI00530767	47 kDa	100% (2)		100% (7)	100% (4)	100% (2)
100	Wound-responsive family protein	IPI00546371 (+1)	37 kDa				100% (4)	100% (3)
101	Leucine-rich repeat family protein	IPI00546779	40 kDa	99% (3)			100% (5)		100% (5)
102	60S ribosomal protein L14-2	IPI00543846	16 kDa				100% (5)
103	50S ribosomal protein L4, chloroplast precursor	IPI00519853 (+2)	31 kDa				100% (5)		100% (2)
104	40S ribosomal protein S6-1	IPI00538864	28 kDa				100% (5)
105	60S ribosomal protein L10a-2	IPI00541952	24 kDa				100% (6)		100% (3)
106	40S ribosomal protein S8 (RPS8A)	IPI00524577	25 kDa				100% (6)		100% (3)
107	60S ribosomal protein L12-2	IPI00532442	18 kDa				100% (6)		100% (3)
108	Putative alpha-carboxyltransferase	IPI00527409 (+1)	89 kDa		100% (2)		100% (7)
109	ATP-citrate synthase	IPI00537093	66 kDa	83% (2)		100% (2)	100% (7)		100% (3)
110	60S ribosomal protein L13-1	IPI00547367	24 kDa				100% (7)		100% (2)
111	Aminotransferase class I and II family protein	IPI00519660 (+1)	46 kDa	100% (4)			100% (7)
112	F2J10.9 protein	IPI00535467	283 kDa	100% (3)			100% (7)
113	Polypyrimidine tract-binding protein homolog 3	IPI00544143	48 kDa	100% (2)			100% (8)	100% (2)	100% (2)
114	60S ribosomal protein L18-3	IPI00532781	21 kDa				100% (8)		100% (2)
115	F23N19.18	IPI00521180	201 kDa	100% (4)		99% (2)	100% (8)		100% (3)
116	Expressed protein, non-consensus GC donor splice site at exon 1, unknown (C40) protein, Homo sapiens, EMBL:AF103798	IPI00525404 (+2)	50 kDa	100% (8)			100% (8)	100% (2)	100% (3)
117	Chloroplast division protein FtsZ (FtsZ2-1)	IPI00539833	51 kDa	100% (4)		100% (11)	100% (10)		100% (13)
118	60S ribosomal protein L7-2	IPI00544214	28 kDa	100% (3)		99% (2)	100% (13)
119	Hypothetical protein F14P22.230	IPI00519048	91 kDa	100% (7)			100% (14)
120	Rcd1-like cell differentiation protein	IPI00525457	35 kDa	100% (14)			100% (15)
121	60S ribosomal protein L6-3	IPI00543748	26 kDa		100% (2)		100% (17)		100% (5)
122	Encodes one of two Arabidopsis RAPTOR/KOG1 homologs	IPI00548502	148 kDa	100% (7)			100% (28)
123	Transcriptional regulator-related	IPI00529675	264 kDa	100% (32)			100% (58)
124	Expressed protein	IPI00542797	54 kDa	100% (4)	100% (2)	100% (5)		100% (2)	100% (6)
125	ATP synthase gamma chain 1, chloroplast precursor	IPI00525302	41 kDa	83% (2)	100% (3)	99% (2)		100% (3)	100% (3)
126	Tubulin beta-2/beta-3 chain	IPI00525001	51 kDa	100% (8)	100% (10)	100% (9)		100% (4)	100% (10)
127	Glutamine synthetase, chloroplast/mitochondrial precursor	IPI00534852	47 kDa	83% (2)	100% (7)	100% (5)		100% (5)	100% (8)
128	Jacalin lectin family protein	IPI00541826	72 kDa	100% (5)	100% (9)	100% (14)		100% (9)	100% (3)
129	Glyceraldehyde-3-phosphate dehydrogenase B, chloroplast precursor	IPI00541680	48 kDa	100% (9)	100% (14)	100% (10)		100% (11)	100% (12)
130	Beta-glucosidase homolog precursor	IPI00521974 (+1)	60 kDa	100% (23)	100% (20)	100% (23)		100% (17)	100% (14)
131	Chloroplast 50S ribosomal protein L2	IPI00529344	30 kDa	100% (3)	100% (2)	76% (1)			98% (1)
132	40S ribosomal protein S5-1	IPI00538615 (+1)	23 kDa	82% (1)	75% (1)	99% (2)		97% (1)	100% (3)
133	Myrosinase-binding protein-like At3g16470	IPI00538456	48 kDa	100% (11)	100% (18)	100% (19)		100% (12)	100% (5)
134	Protochlorophyllide reductase B, chloroplast precursor	IPI00549013	43 kDa	100% (3)	100% (4)	100% (3)		100% (2)	100% (3)
135	Chlorophyll A-B binding protein	IPI00532189 (+1)	29 kDa	100% (4)	100% (4)	100% (5)		100% (3)	100% (3)
136	Expressed protein	IPI00530400	41 kDa		100% (2)	99% (2)	86% (2)	100% (3)	100% (2)
137	Elongation factor EF-2	IPI00517335	94 kDa		100% (5)	100% (2)	100% (2)	100% (2)	100% (2)
138	Protein At5g06450	IPI00525436	23 kDa		100% (4)	100% (3)	100% (2)	100% (3)	100% (4)
139	Wound-responsive protein-related	IPI00543627	36 kDa		100% (3)	100% (4)	100% (2)	100% (5)	100% (2)
140	Peptidoglycan-binding domain-containing protein	IPI00537075	44 kDa		100% (16)	100% (8)	100% (2)	100% (11)	100% (14)
141	Dynamin-2A	IPI00539942	99 kDa		100% (2)	100% (3)	100% (5)	100% (5)	100% (10)
142	Vacuolar ATP synthase catalytic subunit A	IPI00525922	69 kDa		100% (7)	100% (2)	100% (5)	100% (7)	100% (2)
143	ATP synthase subunit beta-3, mitochondrial precursor	IPI00517502 (+2)	60 kDa		100% (4)	100% (2)	100% (5)	100% (2)	100% (3)
144	Aquaporin PIP1.2	IPI00536778	31 kDa	100% (8)	100% (3)	100% (3)	100% (6)	100% (3)
145	Hydrolase	IPI00533189	42 kDa	100% (9)	100% (3)	100% (3)	100% (8)	100% (3)
146	60S acidic ribosomal protein P0-2	IPI00517961	34 kDa	100% (2)	100% (2)	100% (4)	100% (10)	100% (2)
147	Isoform Long of Ribulose bisphosphate carboxylase/oxygenase activase	IPI00526733	52 kDa	100% (16)		100% (20)	100% (13)	100% (15)	100% (14)
148	mRNA decapping enzyme-like protein	IPI00517774	41 kDa	100% (11)	100% (3)	100% (5)	100% (15)		100% (8)
149	Expressed protein	IPI00544788	87 kDa	100% (14)		41% (0)	100% (17)	99% (1)	100% (3)
150	Peroxisomal targeting signal type 1 receptor (PEX5)	IPI00545622	81 kDa	100% (10)		100% (6)	100% (17)	100% (4)	100% (9)
151	Isoform 1 of Dynamin-related protein 1A	IPI00540791	68 kDa	100% (10)	100% (6)	100% (11)	100% (19)	100% (16)	100% (17)
152	Molybdenum cofactor synthesis protein 3	IPI00524834	51 kDa	100% (16)	75% (1)	100% (7)	100% (20)	100% (7)	100% (9)
153	Catalase-3	IPI00542721	57 kDa	100% (16)	100% (11)	100% (14)	100% (22)	100% (14)	100% (11)
154	Peroxisomal protein (PEX14)	IPI00527164	56 kDa	100% (21)	100% (14)	100% (17)	100% (26)	100% (19)	100% (20)
155	Cinnamoyl-CoA reductase family	IPI00542037	35 kDa	100% (14)	100% (8)	100% (14)	100% (16)	100% (14)	100% (18)
156	Ribulose bisphosphate carboxylase large chain precursor	IPI00535114	53 kDa	100% (16)	100% (22)	100% (13)	100% (16)	100% (16)	100% (15)
157	Dynamin-2B	IPI00544500	100 kDa	100% (4)	100% (3)	100% (12)	100% (13)	100% (18)	100% (19)
158	Threonine synthase, chloroplast	IPI00523359 (+1)	59 kDa	100% (13)	100% (2)	100% (11)	100% (12)	100% (5)	100% (13)
159	Glyceraldehyde 3-phosphate dehydrogenase	IPI00518090	37 kDa	100% (12)	100% (8)	100% (11)	100% (12)	100% (8)	100% (10)
160	Dynamin-related protein 1E	IPI00528678	70 kDa	100% (9)	100% (3)	100% (13)	100% (12)	100% (14)	100% (20)
161	Beta-glucosidase	IPI00533497	60 kDa	100% (14)	100% (17)	100% (21)	100% (10)	100% (14)	100% (13)
162	Elongation factor Tu, chloroplast precursor	IPI00520474	52 kDa	100% (15)	100% (10)	100% (10)	100% (9)	100% (8)	100% (12)
163	Heat shock cognate 70 kDa protein 1	IPI00543293	71 kDa	100% (5)	100% (8)	100% (6)	100% (10)	100% (5)	100% (5)
164	Glyceraldehyde-3-phosphate dehydrogenase A	IPI00537303	42 kDa	100% (15)	100% (18)	100% (14)	100% (8)	100% (15)	100% (18)
165	T6D22.2	IPI00548618	107 kDa	100% (9)	100% (4)	100% (6)	100% (7)	100% (2)	100% (3)
166	Expressed protein	IPI00530218	23 kDa	99% (3)	100% (7)	100% (8)	100% (7)	100% (9)	100% (8)
167	Aquaporin PIP2.1	IPI00532482	30 kDa	100% (7)	100% (4)	100% (5)	100% (5)	100% (2)	100% (4)
168	Tubulin alpha-2/alpha-4 chain	IPI00547933	50 kDa	100% (6)	100% (5)	100% (9)	100% (5)	100% (4)	100% (4)
169	ATP synthase subunit alpha	IPI00540632	55 kDa	100% (16)	100% (12)	100% (15)	100% (6)	100% (7)	100% (11)
170	Chlorophyll a-b binding protein 2, chloroplast precursor	IPI00547631	28 kDa	100% (4)	100% (6)	100% (5)	100% (5)	100% (6)	100% (4)
171	5-methyltetrahydropteroyltriglutamate--homocysteine methyltransferase	IPI00522440	84 kDa	100% (16)	100% (16)	100% (23)	100% (5)	100% (14)	100% (14)
172	Aquaporin PIP2.7	IPI00528492	30 kDa	100% (4)	100% (2)	100% (3)	100% (4)	100% (3)	100% (2)
173	Phosphoglycerate kinase	IPI00535490	50 kDa	100% (9)	100% (14)	100% (10)	100% (4)	100% (9)	100% (9)
174	Chlorophyll a-b binding protein CP26	IPI00535216	30 kDa	100% (6)	100% (10)	100% (10)	86% (2)	100% (5)	100% (5)
175	Myrosinase-associated protein	IPI00547045	44 kDa	100% (14)	100% (15)	100% (18)	86% (2)	100% (13)	100% (11)
176	Similar to ATP-dependent Clp protease subunit	IPI00535976	103 kDa	100% (16)	100% (7)	100% (11)	100% (2)	100% (5)	100% (9)
177	ADP,ATP carrier protein 1, mitochondrial precursor	IPI00546691	41 kDa	100% (3)	100% (7)	100% (6)	100% (3)	100% (3)	100% (3)
178	ATP synthase subunit beta	IPI00525776	54 kDa	100% (12)	100% (18)	100% (22)	100% (3)	100% (14)	100% (16)
179	DEAD/DEAH box helicase	IPI00538730 (+1)	132 kDa	100% (3)
180	50S ribosomal protein L19-2, chloroplast precursor	IPI00525994	25 kDa	99% (2)
181	Pentatricopeptide (PPR) repeat-containing protein	IPI00524079	60 kDa	100% (2)
182	Importin alpha-2	IPI00534241	50 kDa	99% (2)
183	Pleiotropic drug resistance protein 8	IPI00520351	165 kDa	100% (2)
184	DNAJ heat shock family protein	IPI00546418	57 kDa	99% (2)
185	Probable aquaporin PIP1.5	IPI00536498	31 kDa	100% (2)
186	Probable rhamnose biosynthetic enzyme 1	IPI00543019	75 kDa			99% (2)
187	NADH-ubiquinone oxidoreductase 51 kDa subunit	IPI00521150	53 kDa			99% (2)
188	Glutathione S-transferase PM24	IPI00535149	24 kDa			99% (2)
189	Chlorophyll A-B binding protein	IPI00516813	26 kDa			100% (2)
190	Similar to methylcrotonyl-CoA carboxylase alpha chain	IPI00657130	54 kDa			100% (2)
191	Putative protein At4g01050	IPI00522460	49 kDa			99% (2)
192	Tubulin beta-6 chain	IPI00545934	51 kDa			99% (2)
193	Histone H2B.6	IPI00521247 (+5)	16 kDa			99% (2)
194	Photosystem II 44 kDa reaction center protein precursor	IPI00527600	52 kDa			100% (2)
195	RuBisCO large subunit-binding protein subunit beta	IPI00544292	64 kDa		100% (7)
196	Coatomer protein epsilon subunit family protein	IPI00518170	33 kDa		100% (2)
197	Asparagine synthetase 2 (ASN2)	IPI00524294 (+1)	65 kDa		100% (2)
198	Oxygen-evolving enhancer protein 2-1	IPI00540742	28 kDa		100% (2)
199	Magnesium-protoporphyrin IX monomethyl ester [oxidative] cyclase	IPI00517126	48 kDa		100% (2)
200	Carbonic anhydrase 2	IPI00523587	28 kDa		100% (3)
201	Mitochondrial phosphate transporter	IPI00516766	40 kDa		100% (2)
202	14-3-3-like protein GF14 lambda	IPI00517027 (+1)	28 kDa		100% (2)
203	14-3-3-like protein GF14 chi	IPI00528961 (+1)	30 kDa		100% (2)
204	Expressed protein	IPI00533711	92 kDa		100% (2)
205	Vestitone reductase-related	IPI00547139	44 kDa		100% (2)
206	Apocytochrome f precursor	IPI00547341	35 kDa		100% (3)
207	Beta-adaptin	IPI00516448 (+2)	99 kDa				100% (2)
208	Plastid developmental protein DAG	IPI00532519	26 kDa				100% (2)
209	ATP-citrate synthase	IPI00519475	66 kDa				100% (2)
210	60S ribosomal protein L17-1	IPI00538721 (+1)	20 kDa				100% (2)
211	40S ribosomal protein S16	IPI00534336	17 kDa				100% (2)
212	Phosphate-responsive protein	IPI00531827	33 kDa				100% (2)
213	40S ribosomal protein S7 (RPS7B)	IPI00526726	22 kDa				100% (2)
214	Subtilase family protein	IPI00522734	81 kDa				100% (2)
215	31.2 kDa small heat shock family protein	IPI00541433 (+1)	31 kDa				100% (2)
216	Vacuolar ATP synthase subunit C	IPI00549006	43 kDa				100% (2)
217	40S ribosomal protein S24 (RPS24B)	IPI00524234	15 kDa				100% (2)
218	40S ribosomal protein S23-2	IPI00535189 (+1)	16 kDa				100% (2)
219	SAR DNA-binding protein	IPI00543036	59 kDa				100% (2)
220	Rae1-like protein At1g80670	IPI00547787	38 kDa				100% (2)
221	40S ribosomal protein S3A (RPS3aA)	IPI00543912	30 kDa				100% (2)
222	60S ribosomal protein L10a-1	IPI00519555	24 kDa				100% (2)
223	60S ribosomal protein L27-3	IPI00528946	16 kDa				100% (2)
224	40S ribosomal protein S11-1	IPI00541286	18 kDa				100% (2)
225	60S ribosomal protein L26-1	IPI00524384	17 kDa				100% (2)
226	60S ribosomal protein L9-1	IPI00545250	22 kDa				100% (2)
227	Gamma-tubulin complex component 4 homolog	IPI00523260	86 kDa				100% (2)
228	Phototropic-responsive NPH3 family protein	IPI00518683	70 kDa				100% (2)
229	Tubulin family protein	IPI00520687	95 kDa				100% (3)
230	Dihydrolipoamide S-acetyltransferase (LTA2)	IPI00549147	50 kDa				100% (3)
231	Putative H/ACA ribonucleoprotein complex subunit 1-like protein 1	IPI00548450	21 kDa				100% (3)
232	40S ribosomal protein S13-1	IPI00518946 (+1)	17 kDa				100% (3)
233	40S ribosomal protein S15-1	IPI00537286 (+2)	17 kDa				100% (3)
234	40S ribosomal protein S3 (RPS3A)	IPI00542059 (+1)	28 kDa				100% (3)
235	60S ribosomal protein L35-2	IPI00526629 (+1)	14 kDa				100% (3)
236	60S ribosomal protein L35a-4	IPI00542655	13 kDa				100% (3)
237	Protein containing PAM2 motif	IPI00520416 (+1)	17 kDa				100% (3)
238	Putative 60S ribosomal protein L30-1	IPI00524861 (+1)	12 kDa				100% (3)
239	40S ribosomal protein S24	IPI00527080	15 kDa				100% (3)
240	Expressed protein	IPI00527574	43 kDa				100% (3)
241	Aquaporin TIP3.1	IPI00524387 (+1)	28 kDa				100% (3)
242	Phospholipase D alpha 1	IPI00527854	92 kDa				100% (3)
243	Isoform 1 of 60S ribosomal protein L36-2	IPI00535376 (+1)	13 kDa				100% (3)
244	Splicing factor	IPI00547640	141 kDa				100% (3)
245	60S ribosomal protein L18a-2	IPI00548475	21 kDa				100% (3)
246	60S ribosomal protein L7 (RPL7C)	IPI00528026 (+1)	29 kDa				100% (4)
247	Isoform 1 of 60S ribosomal protein L11-2	IPI00537168 (+2)	21 kDa				100% (4)
248	Transcription initiation factor-related	IPI00528101	32 kDa				100% (4)
249	60S ribosomal protein L21-2	IPI00525678 (+1)	19 kDa				100% (4)
250	60S ribosomal protein L8-1	IPI00517953	28 kDa				100% (4)
251	60S ribosomal protein L23a-2	IPI00529643 (+1)	17 kDa				100% (4)
252	Phosphoprotein-related	IPI00528542	121 kDa				100% (4)
253	60S ribosomal protein L6-1	IPI00522202	26 kDa				100% (4)
254	Ribose-phosphate pyrophosphokinase 5	IPI00547336	43 kDa				100% (5)
255	60S ribosomal protein L27a-2	IPI00544566 (+1)	16 kDa				100% (5)
256	Tubulin gamma-1 chain	IPI00539131 (+1)	53 kDa				100% (5)
257	40S ribosomal protein S9 (RPS9B)	IPI00534338	23 kDa				100% (5)
258	Hypothetical protein At1g43170	IPI00540778	63 kDa				100% (6)
259	40S ribosomal protein S4	IPI00521495 (+3)	30 kDa				100% (7)
260	60S ribosomal protein L5-1	IPI00548063	34 kDa				100% (8)
261	60S ribosomal protein L7a-2	IPI00535564	29 kDa				100% (9)
262	60S ribosomal protein L4-2	IPI00521292	45 kDa				100% (11)
263	Chloroplast 50S ribosomal protein L16	IPI00548998	15 kDa						100% (2)
264	Expressed protein	IPI00656812	81 kDa						100% (4)
265	40S ribosomal protein S14-2	IPI00532008	16 kDa						100% (3)
266	Encodes a regulatory subunit of the 26S proteosome	IPI00529314	98 kDa						100% (3)
267	Fructose-bisphosphate aldolase	IPI00548350	38 kDa						100% (2)
268	Hydrolase	IPI00526636	39 kDa						100% (2)
269	Gibberellin-regulated protein 1 precursor	IPI00535174	11 kDa						100% (2)
270	30S ribosomal protein S1	IPI00524792	45 kDa						100% (2)
271	Vesicle-fusing ATPase	IPI00527613	81 kDa						100% (3)
272	F22O13.14	IPI00542631 (+1)	51 kDa						100% (2)
273	WD-40 repeat family protein	IPI00520108 (+1)	124 kDa						100% (3)
274	Histone H4	IPI00520838	11 kDa						100% (2)
275	Chaperonin	IPI00534136	57 kDa						100% (2)
276	Photosystem II stability/assembly factor HCF136	IPI00539527	44 kDa						100% (2)
277	FtsH protease (VAR2)	IPI00546467	74 kDa						100% (2)
278	UDP-glucoronosyl/UDP-glucosyl transferase	IPI00521753	53 kDa						100% (2)
279	Malate dehydrogenase	IPI00524343	42 kDa						100% (2)
280	Expressed protein	IPI00539157	23 kDa						100% (2)
281	Ribosomal protein L13 family protein	IPI00520181	27 kDa						100% (2)
282	Chloroplast 30S ribosomal protein S7	IPI00519008	17 kDa						100% (2)
283	Chloroplast 30S ribosomal protein S4	IPI00516311	23 kDa						100% (3)
284	50S ribosomal protein L3-1	IPI00516913	29 kDa						100% (5)
285	Putative glycine dehydrogenase [decarboxylating] 2	IPI00536025	113 kDa					100% (2)
286	Fructose-bisphosphate aldolase	IPI00549111 (+2)	43 kDa					100% (2)
287	Ulp1 protease family protein	IPI00534497	75 kDa					100% (2)
288	Nascent polypeptide-associated complex subunit alpha-like protein 1	IPI00519859 (+1)	22 kDa					100% (2)
289	Protochlorophyllide reductase C	IPI00547002 (+1)	44 kDa					100% (2)
290	Delta-aminolevulinic acid dehydratase	IPI00537155	47 kDa					100% (2)
291	Protease inhibitor/seed storage/lipid transfer protein (LTP) family protein	IPI00531568	30 kDa					100% (2)
292	Luminal-binding protein 2 precursor	IPI00526247 (+1)	74 kDa					100% (2)
